# Supplementary material for: The Exo-Polysaccharide Component of Extracellular Matrix is Essential for the Viscoelastic Properties of Bacillus subtilis Biofilms
Source: MDPI journal article supplement (doi:10.3390/ijms21186755), 2020-09-15
Supplement: s1 [file s1]

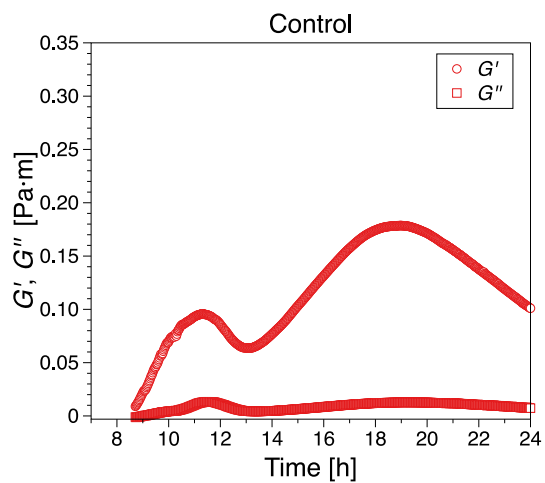

**Figure S1.** Dynamic moduli,  $G'$  and  $G''$ , of the Control biofilm grown for the strain sweep test in Figure 8. Note the pronounced decrease in dynamic moduli in region IV, decrease that was not accounted for in the standard deviation calculations in Figure 2.
